# Supplementary material for: Study on the bZIP-Type Transcription Factors NapA and RsmA in the Regulation of Intracellular Reactive Species Levels and Sterigmatocystin Production of Aspergillus nidulans
Source: MDPI journal article supplement (doi:10.3390/ijms222111577), 2021-10-27
Supplement: s1 [file s1]

|                  |                      | Colony diameter (mm)      |                            |                            |                               |                                             |
|------------------|----------------------|---------------------------|----------------------------|----------------------------|-------------------------------|---------------------------------------------|
| Strain           |                      | untreated                 | diamide<br>(2 mmol/l)      | MSB<br>(0.12 mmol/l)       | <i>t</i> BOOH<br>(0.8 mmol/l) | H <sub>2</sub> O <sub>2</sub><br>(6 mmol/l) |
| <b>RWY 6.2</b>   | <i>ΔrsmA ΔnapA</i>   | 60.30 ± 0.23              | 8.03 ± 0.85 <sup>ab</sup>  | n.d. <sup>ab</sup>         | n.d. <sup>ab</sup>            | n.d. <sup>ab</sup>                          |
| <b>RWY 10.3</b>  | <i>ΔnapA</i>         | 61.50 ± 0.34              | 10.35 ± 1.17 <sup>ab</sup> | n.d. <sup>ab</sup>         | n.d. <sup>ab</sup>            | n.d. <sup>ab</sup>                          |
| <b>RWY 34.30</b> | <i>OErsmA ΔnapA</i>  | 61.50 ± 0.57              | 17.93 ± 0.13 <sup>ab</sup> | n.d. <sup>ab</sup>         | n.d. <sup>ab</sup>            | n.d. <sup>ab</sup>                          |
| <b>RWY 8.5</b>   | <i>ΔrsmA</i>         | 60.23 ± 1.45              | 13.50 ± 0.68 <sup>ab</sup> | 32.03 ± 0.26 <sup>a</sup>  | 47.10 ± 0.85 <sup>a</sup>     | 51.98 ± 1.79 <sup>a</sup>                   |
| <b>RDIT 9.32</b> | <b>wt</b>            | 60.53 ± 0.45              | 28.2 ± 0.47                | 33 ± 0.13                  | 50.70 ± 1.89                  | 55.28 ± 0.57                                |
| <b>RWY 2.12</b>  | <i>OErsmA</i>        | 58.13 ± 0.56 <sup>a</sup> | 23.98 ± 0.27 <sup>ab</sup> | 38.19 ± 0.37 <sup>ab</sup> | 47.78 ± 0.36 <sup>a</sup>     | 49.06 ± 0.27 <sup>ab</sup>                  |
| <b>RWY 35.5</b>  | <i>ΔrsmA OEnapA</i>  | 63.98 ± 0.47 <sup>a</sup> | 25.28 ± 0.57 <sup>ab</sup> | 41.10 ± 0.69 <sup>ab</sup> | 55.65 ± 0.69 <sup>a</sup>     | 60.75 ± 0.45 <sup>ab</sup>                  |
| <b>RWY 17.3</b>  | <i>OEnapA</i>        | 62.55 ± 0.22 <sup>a</sup> | 26.18 ± 0.47 <sup>ab</sup> | 43.50 ± 0.47 <sup>ab</sup> | 51.68 ± 0.47                  | 53.70 ± 1.11 <sup>b</sup>                   |
| <b>RWY 32.30</b> | <i>OErsmA OEnapA</i> | 63.33 ± 0.18 <sup>a</sup> | 23.45 ± 0.27 <sup>ab</sup> | 47.78 ± 0.37 <sup>ab</sup> | 52.72 ± 0.26 <sup>a</sup>     | 54.21 ± 0.18 <sup>b</sup>                   |

**Table S1** Effects of *napA* and *rsmA* gene manipulations on the colony diameters in stress treated and untreated surface cultures.

Mean±SD calculated from three independent experiments are presented.

<sup>a</sup> - Significant difference compared to the reference strain treated in the same way according to the Dunnatt's test ( $p < 0.05$ ,  $n = 3$ ).

<sup>b</sup> - Significant interaction between the effects of gene manipulation(s) and stress treatment on the colony diameter according to the two-way ANOVA ( $p < 0.05$ ).

n.d. - No growth was detected.

|                  |                      | DCM (g/l)                   |                             |                              |                            |                              |                              |                               |                              |
|------------------|----------------------|-----------------------------|-----------------------------|------------------------------|----------------------------|------------------------------|------------------------------|-------------------------------|------------------------------|
| Strain           |                      | Untreated                   |                             |                              |                            | <i>t</i> BOOH treated        |                              |                               |                              |
|                  |                      | 0 h                         | 12 h                        | 24 h                         | 48 h                       | 0 h                          | 12 h                         | 24 h                          | 48h                          |
| <b>RWY 6.2</b>   | <i>ΔrsmA ΔnapA</i>   | 1.927 ± 0.24 <sup>a</sup>   | 4.980 ± 0.763 <sup>a</sup>  | 4.853 ± 0.411 <sup>abc</sup> | 4.013 ± 0.284 <sup>a</sup> | 1.580 ± 0.069 <sup>ad</sup>  | 4.640 ± 0.243 <sup>a</sup>   | 5.587 ± 0.232 <sup>ab</sup>   | 4.180 ± 0.151 <sup>a</sup>   |
| <b>RWY 10.3</b>  | <i>ΔnapA</i>         | 0.947 ± 0.133 <sup>bc</sup> | 2.460 ± 0.413 <sup>bc</sup> | 5.447 ± 0.424 <sup>ab</sup>  | 3.787 ± 1.060 <sup>a</sup> | 0.827 ± 0.083 <sup>b</sup>   | 1.027 ± 0.264 <sup>b</sup>   | 3.953 ± 1.343 <sup>ac</sup>   | 4.647 ± 0.342 <sup>a,b</sup> |
| <b>RWY 34.30</b> | <i>OErsmA ΔnapA</i>  | 1.050 ± 0.030 <sup>bc</sup> | 2.913 ± 0.515 <sup>bd</sup> | 5.307 ± 0.599 <sup>ab</sup>  | 3.993 ± 0.810 <sup>a</sup> | 1.240 ± 0.122 <sup>acd</sup> | 2.460 ± 0.781 <sup>cd</sup>  | 5.887 ± 0.629 <sup>b</sup>    | 4.387 ± 0.359 <sup>a,b</sup> |
| <b>RWY 8.5</b>   | <i>ΔrsmA</i>         | 1.033 ± 0.023 <sup>bc</sup> | 3.900 ± 0.277 <sup>ad</sup> | 5.020 ± 0.420 <sup>abc</sup> | 3.640 ± 0.299 <sup>a</sup> | 1.020 ± 0.171 <sup>bcd</sup> | 3.633 ± 0.512 <sup>ad</sup>  | 5.727 ± 0.503 <sup>bd</sup>   | 4.620 ± 0.552 <sup>a,b</sup> |
| <b>RDIT 9.32</b> | <b>wt</b>            | 0.747 ± 0.291 <sup>bd</sup> | 4.507 ± 0.372 <sup>a</sup>  | 5.453 ± 0.348 <sup>b</sup>   | 3.900 ± 0.174 <sup>a</sup> | 0.653 ± 0.172 <sup>be</sup>  | 3.233 ± 0.404 <sup>cd</sup>  | 5.753 ± 0.593 <sup>bd</sup>   | 4.333 ± 0.099 <sup>a</sup>   |
| <b>RWY 2.12</b>  | <i>OErmsA</i>        | 0.327 ± 0.050 <sup>d</sup>  | 1.347 ± 0.261 <sup>c</sup>  | 3.533 ± 0.081 <sup>de</sup>  | 3.640 ± 0.382 <sup>a</sup> | 0.340 ± 0.072 <sup>e</sup>   | 0.787 ± 0.197 <sup>b</sup>   | 2.080 ± 0.203 <sup>e</sup>    | 4.920 ± 0.406 <sup>a,b</sup> |
| <b>RWY 35.5</b>  | <i>ΔrsmA OEnapA</i>  | 0.627 ± 0.180 <sup>bd</sup> | 2.853 ± 0.801 <sup>bd</sup> | 3.933 ± 0.231 <sup>cdf</sup> | 4.580 ± 0.701 <sup>a</sup> | 0.653 ± 0.031 <sup>be</sup>  | 3.200 ± 0.594 <sup>cde</sup> | 4.033 ± 0.358 <sup>ac</sup>   | 5.073 ± 1.210 <sup>a,b</sup> |
| <b>RWY 17.3</b>  | <i>OEnapA</i>        | 1.260 ± 0.125 <sup>c</sup>  | 3.627 ± 0.280 <sup>ab</sup> | 4.920 ± 0.203 <sup>abf</sup> | 4.567 ± 1.485 <sup>a</sup> | 1.347 ± 0.180 <sup>ad</sup>  | 3.860 ± 0.236 <sup>ae</sup>  | 4.793 ± 0.194 <sup>abcd</sup> | 5.920 ± 0.733 <sup>b</sup>   |
| <b>RWY 32.30</b> | <i>OErsmA OEnapA</i> | 0.953 ± 0.095 <sup>bc</sup> | 2.460 ± 0.440 <sup>bc</sup> | 2.780 ± 0.579 <sup>e</sup>   | 5.120 ± 0.365 <sup>a</sup> | 0.960 ± 0.159 <sup>bc</sup>  | 2.327 ± 0.376 <sup>c</sup>   | 3.127 ± 0.280 <sup>ace</sup>  | 4.813 ± 0.114 <sup>a,b</sup> |

**Table S2** Comparison of biomass production of the mutants.

Biomass production was characterized with DCM (g/l) values. Data are presented as mean ± SD values calculated from three independent experiments at each time point. Effects of gene manipulations were analysed by one way ANOVA followed by Tukey post-hoc test. Means marked with the same letter do not differ significantly (adj. *p* value < 0.05) from each other.

| Strain           |                      | DCF (pmol/mg DCM)          |                               | Catalase (mkat/kg protein) |                            |
|------------------|----------------------|----------------------------|-------------------------------|----------------------------|----------------------------|
|                  |                      | Untreated                  | <i>t</i> BOOH treated         | Untreated                  | <i>t</i> BOOH treated      |
| <b>RWY 6.2</b>   | <i>ΔrsmA ΔnapA</i>   | 0.641 ± 0.227 <sup>a</sup> | 10.856 ± 3.397 <sup>a*</sup>  | 8850 ± 907 <sup>a</sup>    | 5937 ± 1154 <sup>acd</sup> |
| <b>RWY 10.3</b>  | <i>ΔnapA</i>         | 0.541 ± 0.244 <sup>a</sup> | 45.909 ± 14.209 <sup>b*</sup> | 5597 ± 55 <sup>ab</sup>    | 4661 ± 613 <sup>acd</sup>  |
| <b>RWY 34.30</b> | <i>OErsmA ΔnapA</i>  | 3.096 ± 1.169 <sup>b</sup> | 5.751 ± 1.223 <sup>ac*</sup>  | 5733 ± 1587 <sup>ab</sup>  | 6857 ± 441 <sup>ad</sup>   |
| <b>RWY 8.5</b>   | <i>ΔrsmA</i>         | 0.593 ± 0.181 <sup>a</sup> | 0.703 ± 0.270 <sup>c</sup>    | 13142 ± 381 <sup>c</sup>   | 15762 ± 971 <sup>b</sup>   |
| <b>RDIT 9.32</b> | <b>wt</b>            | 0.521 ± 0.221 <sup>a</sup> | 0.570 ± 0.216 <sup>c</sup>    | 1579 ± 195 <sup>d</sup>    | 897 ± 895 <sup>acd</sup>   |
| <b>RWY 2.12</b>  | <i>OErsmA</i>        | 0.293 ± 0.183 <sup>a</sup> | 1.213 ± 0.434 <sup>c*</sup>   | 4393 ± 569 <sup>bde</sup>  | 3878 ± 202 <sup>c</sup>    |
| <b>RWY 35.5</b>  | <i>ΔrsmA OEnapA</i>  | 0.615 ± 0.379 <sup>a</sup> | 0.257 ± 0.075 <sup>c</sup>    | 15836 ± 473 <sup>f</sup>   | 16007 ± 1779 <sup>b</sup>  |
| <b>RWY 17.3</b>  | <i>OEnapA</i>        | 0.829 ± 0.269 <sup>a</sup> | 0.499 ± 0.251 <sup>c</sup>    | 7555 ± 437 <sup>ae</sup>   | 8474 ± 788 <sup>d</sup>    |
| <b>RWY 32.30</b> | <i>OErsmA OEnapA</i> | 0.769 ± 0.250 <sup>a</sup> | 0.928 ± 0.276 <sup>c</sup>    | 12341 ± 2967 <sup>c</sup>  | 17642 ± 643 <sup>b</sup>   |

**Table S3** Comparison of DCF (RS) production and catalase activities of the mutants.

Data are presented as mean ± SD values calculated from three independent experiments. Effects of the gene manipulations were analyzed by one way ANOVA followed by Tukey post-hoc test. Means marked with the same letter do not differ significantly (adj. *p* value < 0.05) from each other. Effects of *t*BOOH treatment were studied by Student's t-test with Holm's *p*-value correction. Data of *t*BOOH treated cultures marked with “\*” symbol significantly (adj. *p* < 0.05) differ from those of untreated cultures.

| Strain           |                      | ST (mg/g DCM)               |                              |
|------------------|----------------------|-----------------------------|------------------------------|
|                  |                      | Untreated                   | <i>t</i> BOOH treated        |
| <b>RWY 6.2</b>   | <i>ΔrsmA ΔnapA</i>   | 0.855 ± 0.120 <sup>a</sup>  | 0.690 ± 0.229 <sup>ab</sup>  |
| <b>RWY 10.3</b>  | <i>ΔnapA</i>         | 0.264 ± 0.033 <sup>bc</sup> | 0.391 ± 0.023 <sup>ac</sup>  |
| <b>RWY 34.30</b> | <i>OErsmA ΔnapA</i>  | 0.330 ± 0.060 <sup>bd</sup> | 1.020 ± 0.346 <sup>b</sup>   |
| <b>RWY 8.5</b>   | <i>ΔrsmA</i>         | 0.131 ± 0.039 <sup>ce</sup> | 0.211 ± 0.031 <sup>cd</sup>  |
| <b>RDIT 9.32</b> | <b>wt</b>            | 0.066 ± 0.006 <sup>e</sup>  | 0.054 ± 0.026 <sup>cd</sup>  |
| <b>RWY 2.12</b>  | <i>OErmsA</i>        | 0.141 ± 0.016 <sup>ce</sup> | 0.149 ± 0.023 <sup>c</sup>   |
| <b>RWY 35.5</b>  | <i>ΔrsmA OEnapA</i>  | 0.329 ± 0.075 <sup>bd</sup> | 0.283 ± 0.024 <sup>ad</sup>  |
| <b>RWY 17.3</b>  | <i>OEnapA</i>        | 0.048 ± 0.007 <sup>e</sup>  | 0.047 ± 0.008 <sup>c</sup>   |
| <b>RWY 32.30</b> | <i>OErsmA OEnapA</i> | 0.490 ± 0.108 <sup>d</sup>  | 0.601 ± 0.152 <sup>abd</sup> |

**Table S4** ST production of the control and mutant strains.

Data are presented as mean ± SD values calculated from three independent experiments. Effects of the gene manipulations were analyzed by one way ANOVA followed by Tukey post-hoc test. Means marked with the same letter do not differ significantly (adj. *p* value < 0.05) from each other. Effects of *t*BOOH treatment were studied by Student's t-test with Holm's *p*-value correction. No significant differences were found between the ST contents of untreated and *t*BOOH treated cultures.

|                  |                                                        | Untreated                        |                                  | <i>t</i> BOOH treated            |                                   |
|------------------|--------------------------------------------------------|----------------------------------|----------------------------------|----------------------------------|-----------------------------------|
| Strain           |                                                        | <i>napA</i> ( $\Delta$ CP)       | <i>rsmA</i> ( $\Delta$ CP)       | <i>napA</i> ( $\Delta$ CP)       | <i>rsmA</i> ( $\Delta$ CP)        |
| <b>RWY 6.2</b>   | <i><math>\Delta</math>rsmA <math>\Delta</math>napA</i> | -13.859 $\pm$ 1.530 <sup>a</sup> | -15.558 $\pm$ 1.095 <sup>a</sup> | -13.009 $\pm$ 0.978 <sup>a</sup> | -13.328 $\pm$ 0.483 <sup>a</sup>  |
| <b>RWY 10.3</b>  | <i><math>\Delta</math>napA</i>                         | -12.808 $\pm$ 0.799 <sup>a</sup> | -4.168 $\pm$ 0.350 <sup>b</sup>  | -12.818 $\pm$ 0.435 <sup>a</sup> | -4.891 $\pm$ 0.326 <sup>b</sup>   |
| <b>RWY 34.30</b> | <i>O</i> ErsmA <i><math>\Delta</math>napA</i>          | -12.804 $\pm$ 0.309 <sup>a</sup> | 2.211 $\pm$ 0.279 <sup>c</sup>   | -12.698 $\pm$ 0.100 <sup>a</sup> | 1.967 $\pm$ 0.130 <sup>c</sup>    |
| <b>RWY 8.5</b>   | <i><math>\Delta</math>rsmA</i>                         | -2.146 $\pm$ 0.154 <sup>b</sup>  | -14.501 $\pm$ 0.838 <sup>a</sup> | -2.191 $\pm$ 0.785 <sup>b</sup>  | -14.389 $\pm$ 1.888 <sup>ae</sup> |
| <b>RDIT 9.32</b> | wt                                                     | -2.441 $\pm$ 0.439 <sup>b</sup>  | -5.149 $\pm$ 0.378 <sup>b</sup>  | -2.527 $\pm$ 0.642 <sup>b</sup>  | -4.108 $\pm$ 0.388 <sup>b,*</sup> |
| <b>RWY 2.12</b>  | <i>O</i> ErsmA                                         | 1.882 $\pm$ 0.807 <sup>c</sup>   | -0.813 $\pm$ 0.469 <sup>d</sup>  | 2.422 $\pm$ 0.210 <sup>c</sup>   | -1.079 $\pm$ 0.123 <sup>d</sup>   |
| <b>RWY 35.5</b>  | <i><math>\Delta</math>rsmA O</i> EnapA                 | 2.979 $\pm$ 0.257 <sup>c</sup>   | -14.956 $\pm$ 0.264 <sup>a</sup> | 2.982 $\pm$ 0.770 <sup>c</sup>   | -15.136 $\pm$ 0.200 <sup>e</sup>  |
| <b>RWY 17.3</b>  | <i>O</i> EnapA                                         | 1.626 $\pm$ 0.527 <sup>c</sup>   | -1.109 $\pm$ 0.506 <sup>d</sup>  | 1.816 $\pm$ 0.159 <sup>c</sup>   | -1.623 $\pm$ 0.212 <sup>d</sup>   |
| <b>RWY 32.30</b> | <i>O</i> ErsmA <i>O</i> EnapA                          | 1.582 $\pm$ 0.455 <sup>c</sup>   | 3.524 $\pm$ 0.475 <sup>c</sup>   | 1.412 $\pm$ 0.368 <sup>c</sup>   | 2.717 $\pm$ 0.028 <sup>c</sup>    |

**Table S5** Effects of *napA* and *rsmA* overexpression and gene deletion on the transcriptional activity of wild type *rsmA* and *napA* genes.

Data are presented as mean  $\pm$  SD values calculated from three independent experiments. Effects of the gene manipulations were analyzed by one way ANOVA followed by Tukey post-hoc test. Means marked with the same letter do not differ significantly (adj. *p* value < 0.05) from each other. Effects of *t*BOOH treatment was studied by Student's t-test with Holm's *p*-value correction. Significant differences between the *t*BOOH treated and untreated cultures are marked with “\*” symbol.

**Table S6** Oligonucleotides used in this study.

| Name       | Sequence (5'→3')        | Purpose                                                               |
|------------|-------------------------|-----------------------------------------------------------------------|
| AN4562 for | TACCCCTACCCAGAACAG      | forward primer of the <i>rsmA</i> gene used for rRT-PCR               |
| AN4562rev  | CCTTGGAATCATCGCCGTG     | reverse primer of the <i>rsmA</i> gene used for rRT-PCR               |
| AN7513 for | TCTTTACCTTTTCGCCTGACC   | forward primer of the <i>napA</i> gene used for rRT-PCR               |
| AN7513 rev | ACCTCGCCATTGCTGTTTG     | reverse primer of the <i>napA</i> gene used for rRT-PCR               |
| AN6542F    | GAAGTCCTACGAAGTGCCTGATG | forward primer of the reference gene ( <i>actA</i> ) used for rRT-PCR |
| AN6542R    | AAGAACGCTGGGCTGGAA      | reverse primer of the reference gene ( <i>actA</i> ) used for rRT-PCR |
| AN6700F    | CCTATTCCTGAGCAAGTTC     | forward primer of the reference gene used for rRT-PCR                 |
| AN6700R    | TGATGTTCTGACGATGGC      | reverse primer of the reference gene used for rRT-PCR                 |
